# Supplementary material
Source: PubMed Central journal article supplement (PMC3416088)
Supplement: CVI.00130-12_zcd008124497so1.pdf [file CVI.00130-12_zcd008124497so1.pdf]

## Supplement

**Table 1.** Analysis of possible origin of heterogeneous molecular mass of scFv5-2L (a) and scFv3-18L (b).

a)

| scFv5-2L MW | Possible Origin*                                                             |
|-------------|------------------------------------------------------------------------------|
| 26434       | Cleaved after position 22 and 259 +8x mannose                                |
| 26597       | Cleaved after position 22 and 259 +9x mannose                                |
| 26775       | Unknown combination cleavage /glycosylation/adducts                          |
| 26932       | Protein cleaved after position 2 and 259                                     |
| 27060       | Protein cleaved after position 259                                           |
| 27094       | Protein cleaved after position 2 and 259, +1xmannose                         |
| 27220       | Protein cleaved after position 259, + 1x mannose                             |
| 27256       | Protein cleaved after position 2 and 259, + 2x mannose                       |
| 27381       | Protein cleaved <i>Ste13</i> position b and after position 259, + 2x mannose |
| 28181       | Unknown cleavage and glycosylation                                           |
| 28309       | Unknown cleavage and glycosylation                                           |
| 28727       | Unknown cleavage and glycosylation                                           |
| 30,126      | cleaved <i>Ste13</i> position <sup>b</sup> , -1xHis, unglycosylated          |
| 30,288      | cleaved <i>Ste13</i> position <sup>b</sup> , -1xHis, +1x mannose             |
| 30,419      | cleaved <i>Ste13</i> position <sup>b</sup> , + 1x mannose                    |
| 30,582      | cleaved <i>Ste13</i> position <sup>b</sup> , + 2x mannose                    |

\*Cleavage sites *Ste13* (see Figure 6)

b)

| scFv3-18L MW | Possible Origin                                    |
|--------------|----------------------------------------------------|
| 31,552 Da    | cleaved <i>Ste13</i> at position b, unglycosylated |
| 31,712 Da    | cleaved <i>Ste13</i> at position b, + 1x mannose   |
| 31,874 Da    | cleaved <i>Ste13</i> at position b, + 2x mannose   |
| 31,918 Da    | cleaved <i>Ste13</i> at position a, + 1x mannose   |
| 32,036 Da    | cleaved <i>Ste13</i> at position b, + 3x mannose   |
| 32,844 Da    | cleaved <i>Ste13</i> at position b, + 8x mannose   |
